# Supplementary material for: Crumbs3 is a critical factor that regulates invasion and metastasis of colon adenocarcinoma via the specific interaction with FGFR1
Source: PubMed Central journal article supplement — Int J Cancer. 2019 Apr 29;145(10):2740–53. doi: 10.1002/ijc.32336 (PMC6766893; doi:10.1002/ijc.32336), 2019-04-29
Supplement: IJC-145-2740-s002.pdf [file IJC-145-2740-s002.pdf]

**a**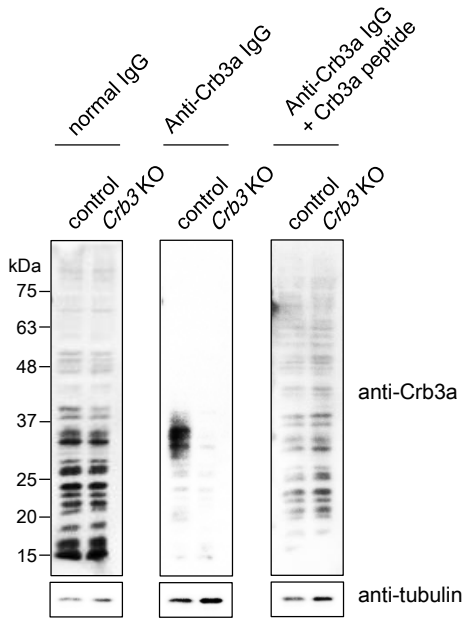**b**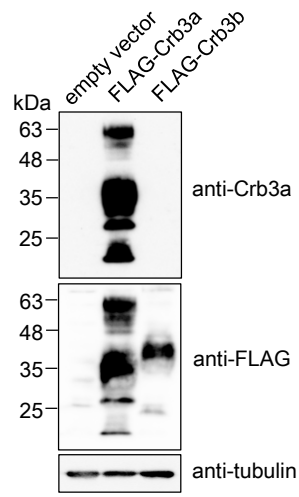**c**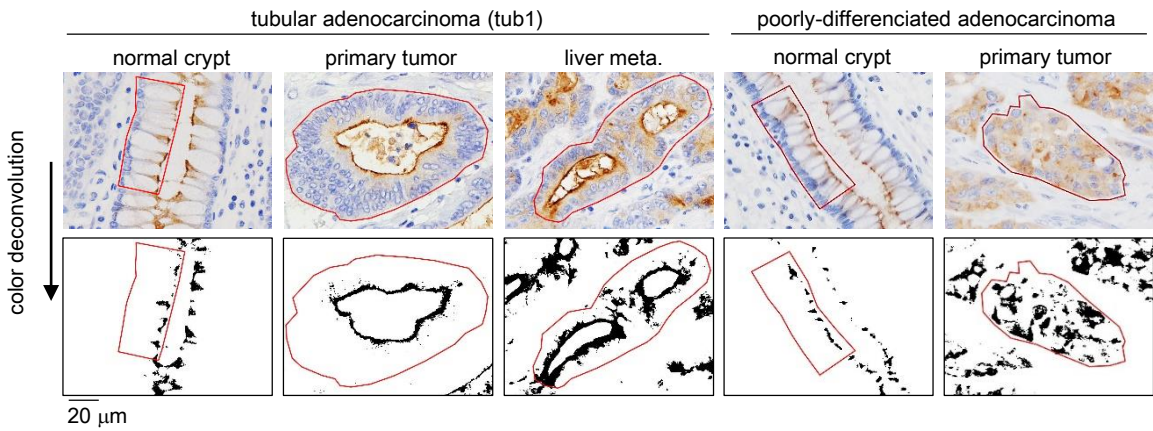**d**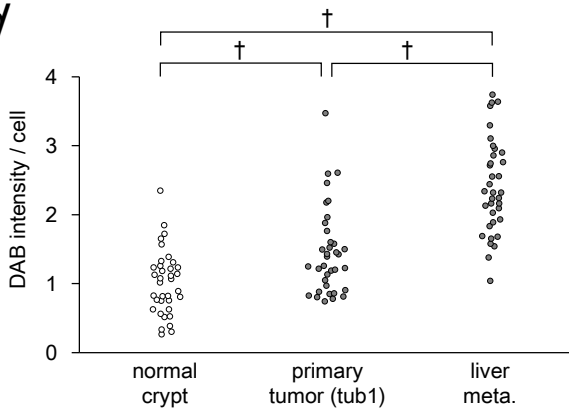**e**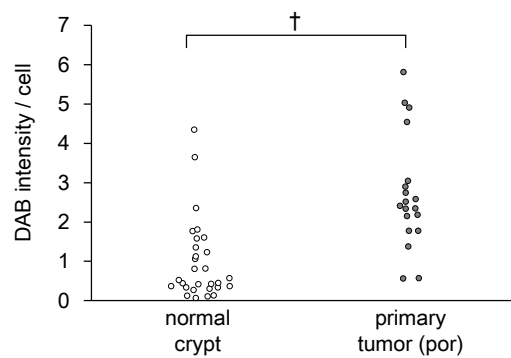

**a**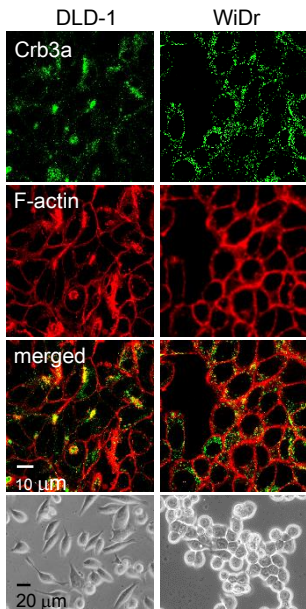**b**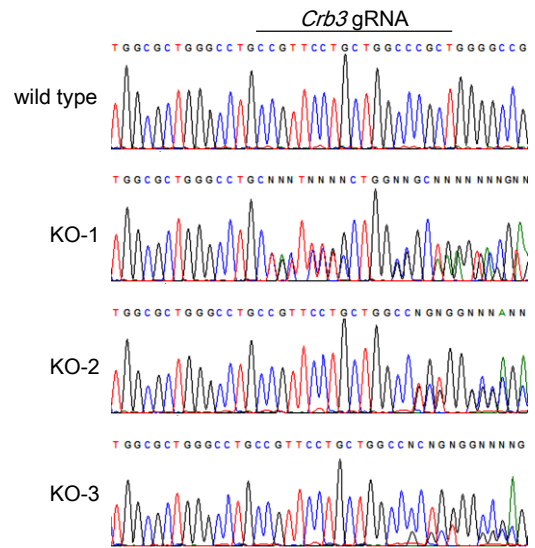**c**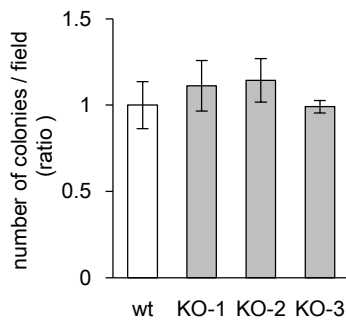**d**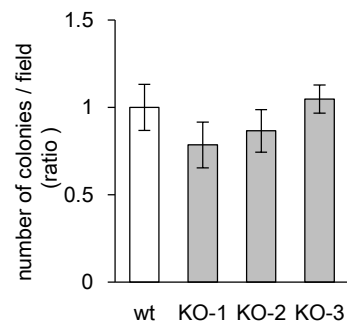**e**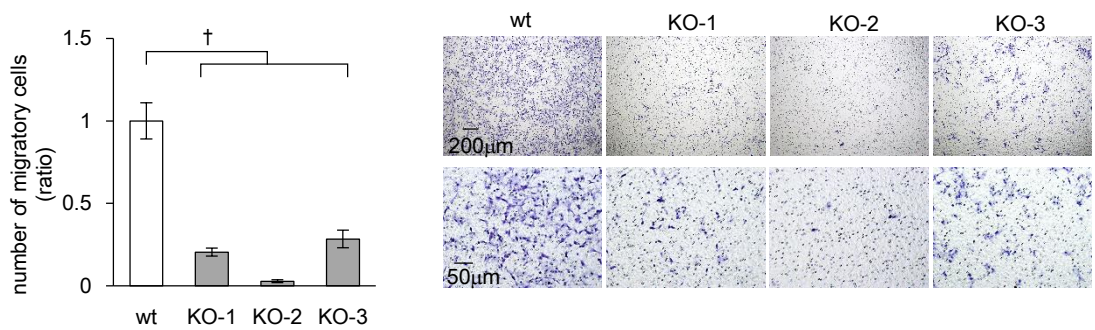

**a**

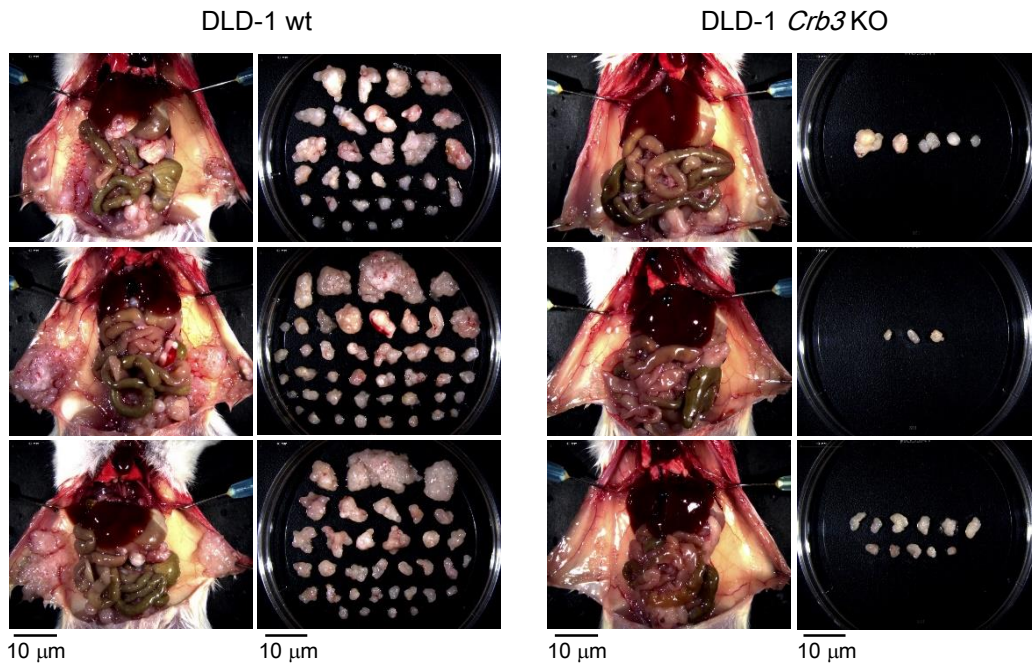

**b**

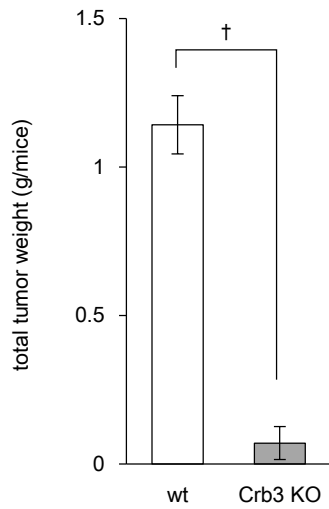

**c**

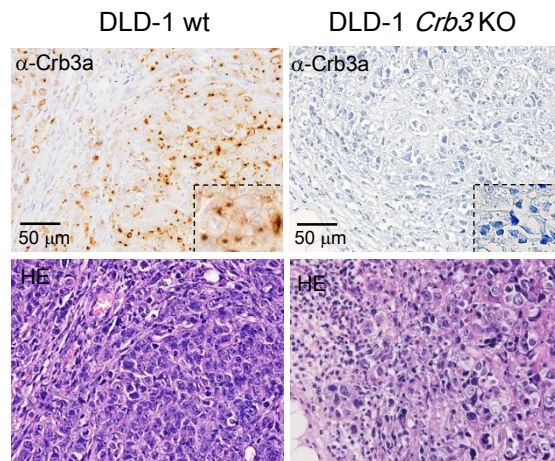

**a**

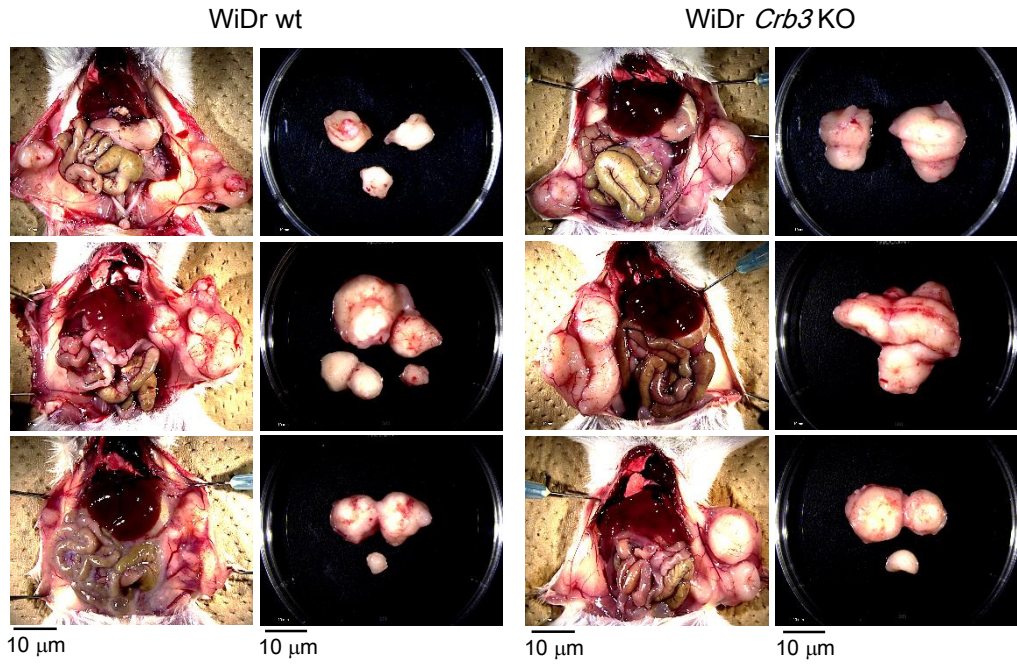

**b**

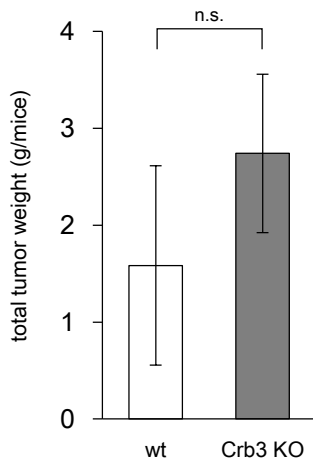

**c**

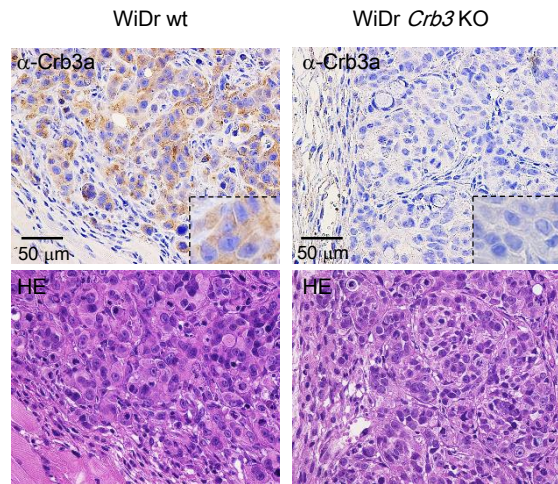

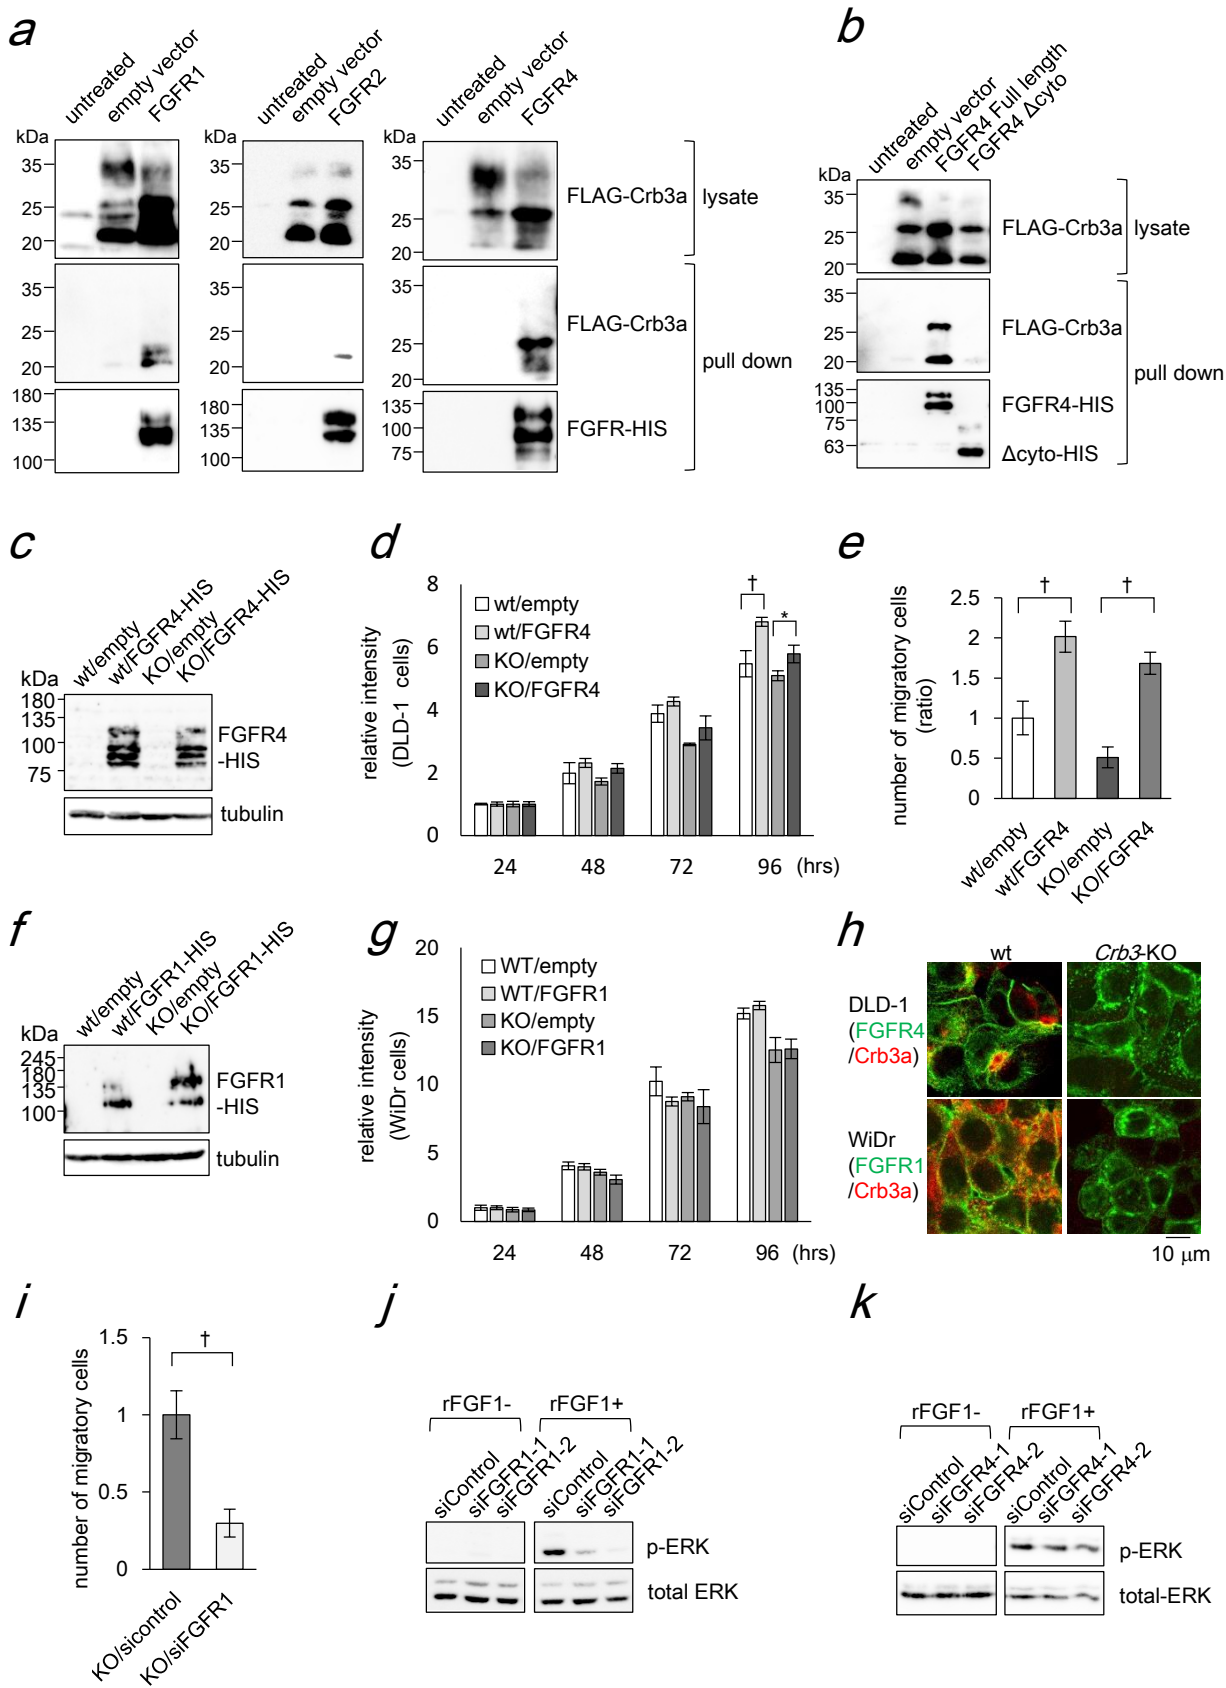

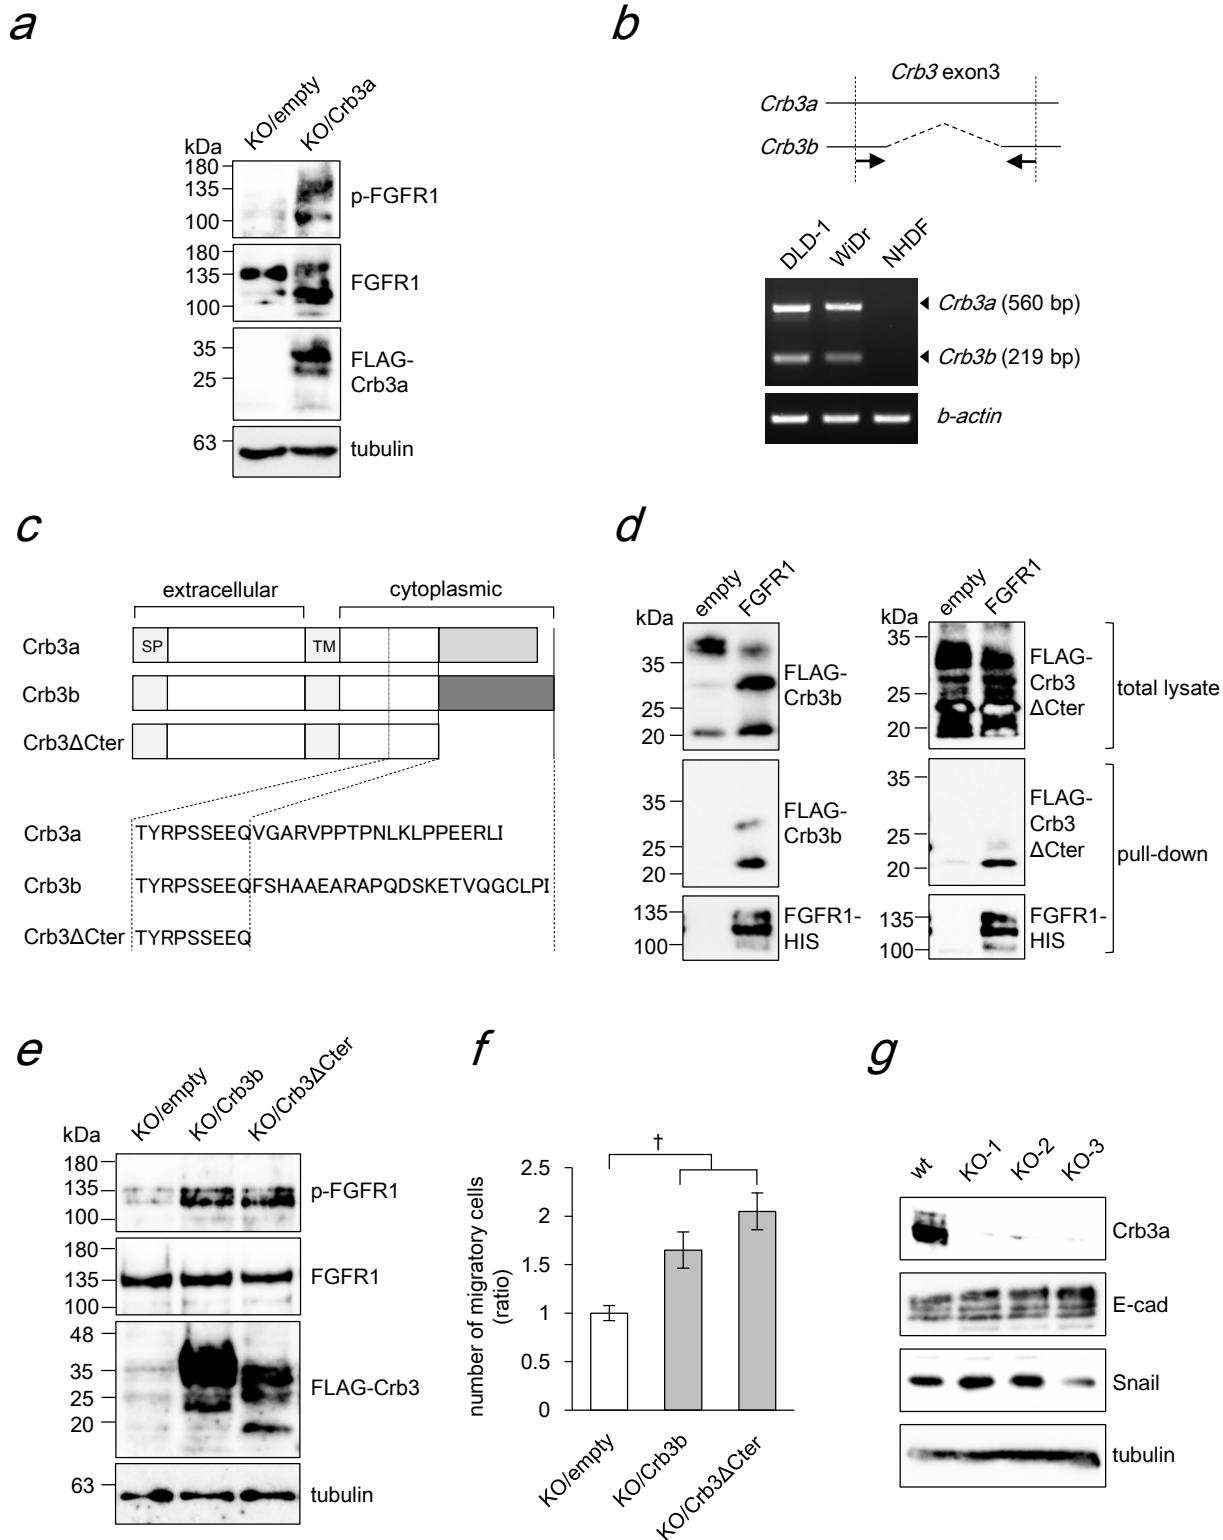

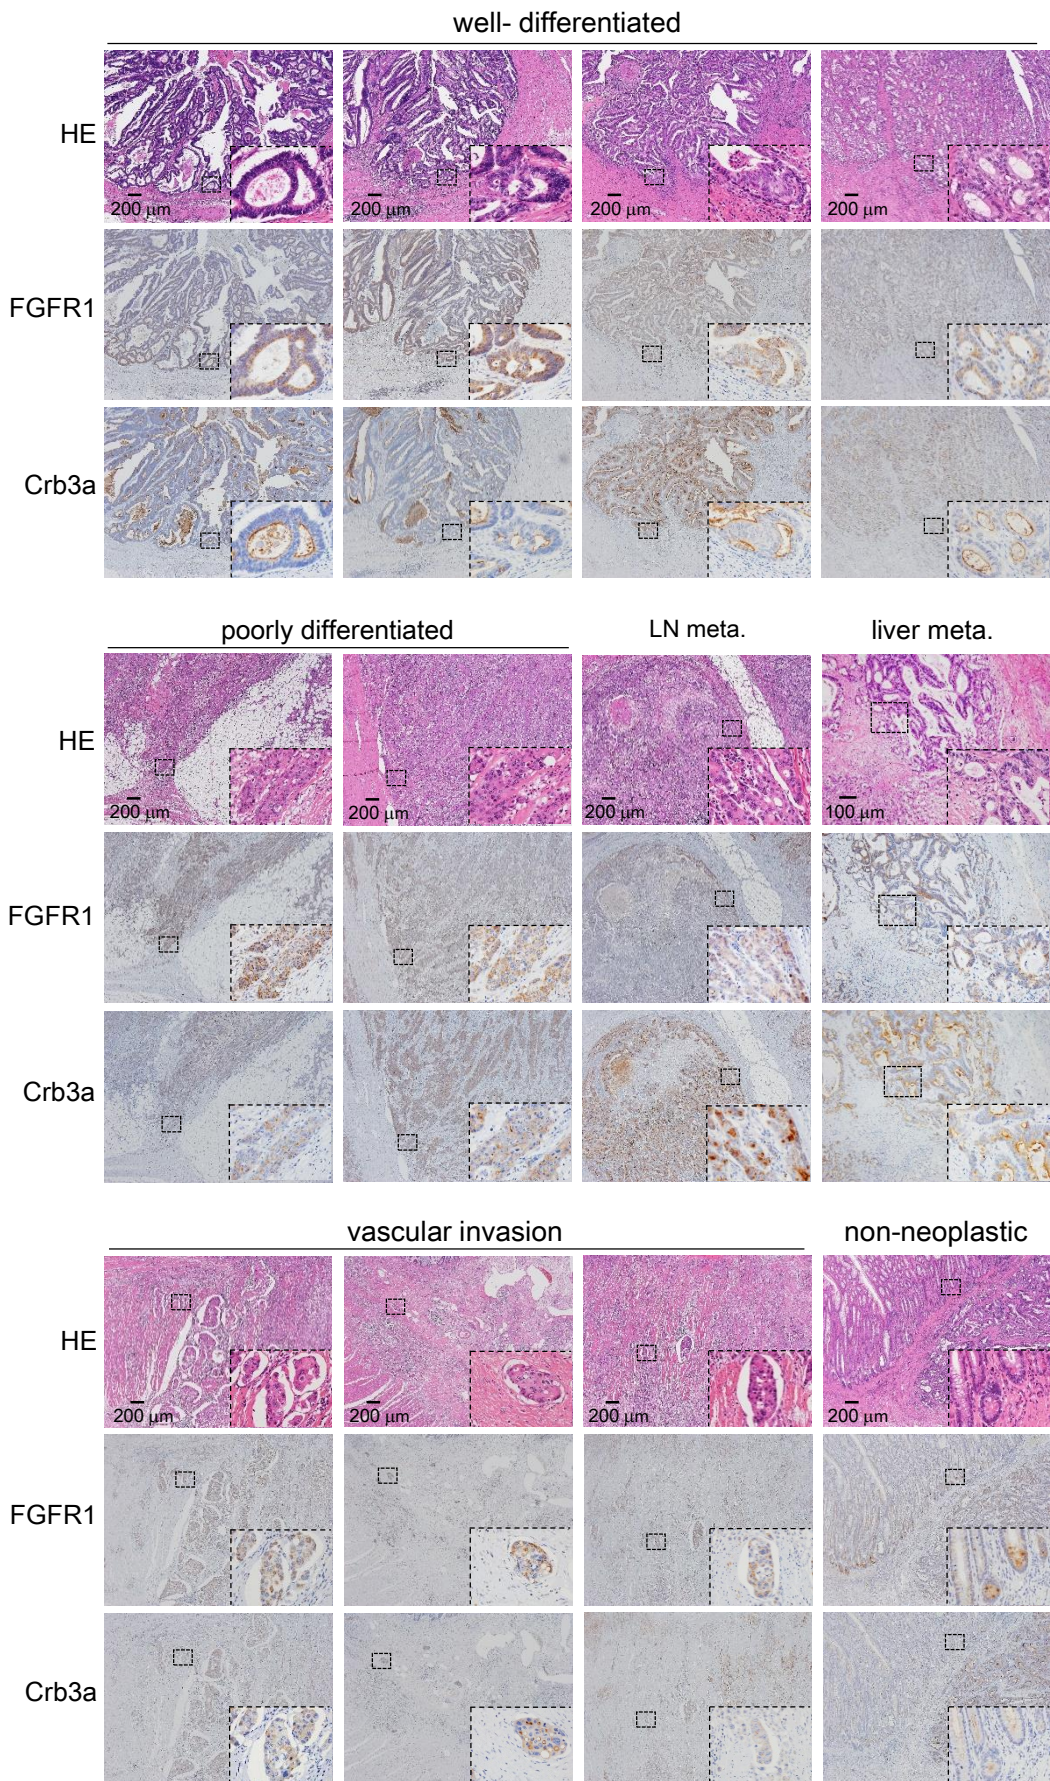

Supporting Information Figure 7 lioka et al.

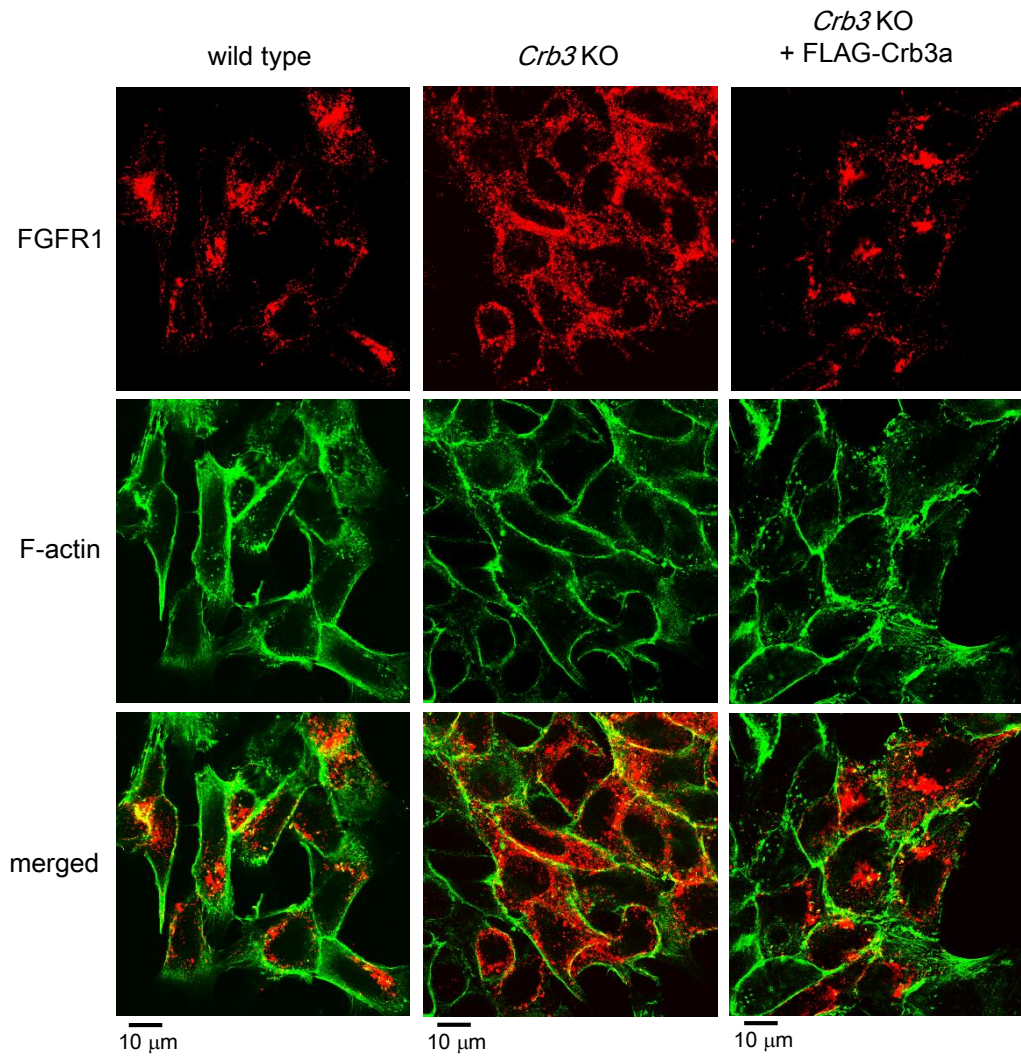



| primers for transient expression vectors | sequence (5' to 3')                                             | application                           | digestion   | plasmid                                                     |                                           |
|------------------------------------------|-----------------------------------------------------------------|---------------------------------------|-------------|-------------------------------------------------------------|-------------------------------------------|
| Crb3a.Fwd.EcoRI                          | CGCGAATTCACCATGGCGAACCCCGGCTG                                   | N-terminal Crb3a amplification        | EcoRI, NheI | pcDNA3-FLAG-Crb3a, pcDNA3-FLAG-Crb3b, pcDNA3-FLAG-Crb3ΔCter |                                           |
| extag.R-Nhe                              | GCCGCTAGCCAAAACAGTGCTATTCTCATTGTC                               |                                       |             |                                                             |                                           |
| extag.F-Mlu                              | GCCACGCGTCCTTCATCCACCAGCTCCA                                    | C-terminal Crb3a, Crb3b amplification | MluI, XhoI  |                                                             |                                           |
| Crb3a.Rvs.XhoI.stp                       | GCGCTCGAGTCAGATGAGCCGCTCTTCCGG                                  |                                       |             |                                                             |                                           |
| Crb3b.Rvs.XhoI.stp                       | GCGCTCGAGCTAGATGGGCAGGCA GCCCTG                                 |                                       |             |                                                             |                                           |
| Crb3Δ1.Rvs.Xho.stp                       | CGCCTCGAGTTACTGCTCCTCGCTA CTGGG                                 |                                       |             |                                                             |                                           |
| FLAG.Nhe.F                               | GCCGCTAGCGACTACAAGGACGACGACGACAAGGGCGGCGACTACAAGGACGACGACGACAAG | FLAG-tag fragment                     | NheI, MluI  |                                                             |                                           |
| FLAG.Mlu.R                               | GCCACGCGTCTTGTCGTCGTCGTCC TTGTAGTCGCC                           |                                       |             |                                                             |                                           |
| FGFR1.Fw.MfeI                            | GCGCAATTGGGGATGTGGAGCTGGA AGTGCCCTCT                            | FGFR1 or FGFR1Δcyto amplification     | MfeI, XhoI  |                                                             | pcDNA3-FGFR1-cHIS, pcDNA3-FGFR1Δcyto-cHIS |
| FGFR1.Rv.XhoI                            | GCGCTCGAGGCGGCGTTTGTAGTCCG CCATTGGCAA                           |                                       |             |                                                             |                                           |
| FGFR1-dCyto.Rv.Xho                       | GCGCTCGAGACTCTTCTTGGTACCA CTCTTC                                |                                       |             |                                                             |                                           |
| FGFR2.Fw.MfeI                            | GCGCAATTGACCATGGTCAGCTGGG GTCGTTTCAT                            | FGFR2 amplification                   | MfeI, XhoI  | pcDNA3-FGFR2-cHIS                                           |                                           |
| FGFR2.Rv.XhoI                            | GCGCTCGAGTCTTGGGTCAGGATAA CAAGGTGAATAC                          |                                       |             |                                                             |                                           |
| FGFR4.Fw.EcoRI                           | CGCGAATTCGAGATGCGGCTGCTGC TGGCCCTGTTG                           | FGFR4 or FGFR4Δcyto amplification     | EcoRI, XhoI | pcDNA3-FGFR4-cHIS pcDNA3-FGFR4Δcyto-cHIS                    |                                           |
| FGFR4.Rv.XhoI                            | GCGCTCGAGTGTCTGCACCCAGAC CCGAAGGGGAA                            |                                       |             |                                                             |                                           |
| FGFR4-dCyto.Rv.Xho                       | GCGCTCGAGCCGGCCGTGGAGCGC CTGCC                                  |                                       |             |                                                             |                                           |
| cHis-XhoSal.F                            | TCGAGGGCCACCACCATCACCATCA CTAAG                                 | HIS-tag addition to FGFR plasmids     | XhoI, SalI  | FGFR plasmids                                               |                                           |
| cHis-XhoSal.Rv                           | TCGACTTAGTGATGGTGATGGTGGT GGCC                                  |                                       |             |                                                             |                                           |

| primers for lentiviral plasmid construction | sequence (5' to 3')                   | application      | insertion                | plasmid                                              |
|---------------------------------------------|---------------------------------------|------------------|--------------------------|------------------------------------------------------|
| pcDNA3.to.pWPI.Fw.inf                       | CTAGCCTCGAGGTTTCGACTCACTATAGGGAGACCC  | Infusion cloning | PmeI site in pWPI vector | pWPI-FLAG-Crb3a pWPI-FGFR1-cHIS pWPI-FGFR1Δcyto-cHIS |
| pcDNA3.to.pWPI.Rv.inf                       | TGCAGCCCCTAGTTTTGACACTATAG AATAGGGCCC |                  |                          |                                                      |

| primers for RT-PCR | sequence (5' to 3')             |
|--------------------|---------------------------------|
| FGFR1.RT.Fw        | ATCCATGAACCTCTGGGGTTCTTC        |
| FGFR1.RT.Rv        | AGGCATACTCCACGATGACATAC         |
| FGFR4.RT.Fw        | GTTTCCCCTATGTGCAAGTCCTA         |
| FGFR4.RT.Rv        | TGGGTCGAGAGGTAGATCTAGAC         |
| Crb3.RT.common.Fw  | GAAGCCATCACTGCTATCATCGT         |
| Crb3.RT.common.Rv  | GCGCTCGAGCTAGATGGGCAGGCA GCCCTG |

| siRNAs                          | target sequence (5' to 3') | product #        | manufacturer |
|---------------------------------|----------------------------|------------------|--------------|
| siCrb3-1                        | CAGGGAAGAAGGUACUUA         | s40936           | Ambion       |
| siCrb3-2                        | AGUGCUUAAUAGCAGGGAA        | s195567          | Ambion       |
| siFGFR1-1                       | GCAUUGUGGAGAAUGAGUA        | s5165            | Ambion       |
| siFGFR1-2 (mixture of 4 siRNAs) | GCCACACUCUGCACCGCUA        | L-003131-00-0005 | Dharmacon    |
|                                 | CCACAGAAUUGGAGGCUAC        |                  |              |
|                                 | CAAAUGCCCUUCCAGUGGG        |                  |              |
|                                 | GAAAUUGCAUGCAGUGCCG        |                  |              |
| siFGFR4-1                       | CAUUGACUACUAUAAAGAAA       | s5176            | Ambion       |
| siFGFR4-2                       | CCACCACAUUGACUACUAU        | s5177            | Ambion       |

## Supporting Information legends

Supporting Information Figure 1. Crb3 expression in cancer cell lines. (a) Specificity of anti-Crb3a antibody was evaluated by the absorption test. Wild type (wt) or *Crb3*-KO DLD-1 cell lysate was analyzed by immunoblot using anti-Crb3a antibody with or without Crb3a peptide. Normal mice IgG is employed as a negative control. (b) The empty vector, FLAG-Crb3a or FLAG-Crb3b expression plasmids were transfected into HEK293T cells, and demonstrated immunoblot using anti-Crb3a antibody. (c) Representative images of immunohistochemistry and color-deconvolution for semi-quantification of Crb3a staining. Intensity of the staining of normal colon crypts or tumor tissues were measured by setting up regions of interest (red) using the ImageJ software. (d) Crb3a staining intensity on immunohistochemistry was compared among normal colon crypts, tubular adenocarcinomas and liver metastases from same patients. Daggers represents statistical significance ( $p < 0.01$ ). (e) Crb3a staining intensity on immunohistochemistry was compared between the normal colon crypts and poorly-differentiated adenocarcinomas in same slides. The dagger represents statistical significance ( $p < 0.01$ ).

Supporting Information Figure 2. Crb3 regulates colon adenocarcinoma cell mobility. (a) Subcellular localization of endogenously expressed Crb3a protein in colon cancer cell lines was analyzed by immunofluorescent. (b) Gene mutation of *Crb3*-KO DLD-1 cells was validated by Sanger sequencing. Genomic DNA sequence around *Crb3* gRNA target site was analyzed. (c) Anchorage-independent proliferation of wt and *Crb3*-KO DLD-1 cells were examined by colony-forming assay. (d) Anchorage-independent proliferation

of wt and *Crb3*-KO WiDr cells were examined by colony-forming assay. (e) Invasiveness of wild type and *Crb3*-KO DLD-1 cells were assayed using matrigel coated transwell chambers. Right panels indicate representative image of invaded cells stained with 20% methanol / 0.1% crystal violet.

Supporting Information Figure 3. *Crb3* deficient DLD-1 displayed significant reduction in metastatic potential. (a) *Crb3* deficiency was examined in DLD-1 human colon cancer xenograft in NOD/SCID mice. Right panels indicate intraabdominal tumors. (b) Quantification of total intraperitoneal tumor weight of wt or *Crb3*-KO DLD-1 injected mice. The data indicate mean  $\pm$  SD of total tumor weight in single mice (n=7), and the dagger represents statistical significance ( $p < 0.01$ ). Statistical significance was tested using unpaired two-tailed student's t-test. (c) Immunohistochemistry of wt and *Crb3*-KO DLD-1 xenograft tumor formed in NOD/SCID mice using anti-Crb3a antibody. Bottom panels indicate HE staining on the same visual field in serial sections.

Supporting Information Figure 4. Tumor progression in mice bearing WiDr xenograft was not altered by deficiency of *Crb3*. (a) *Crb3* deficiency was examined in WiDr human colon cancer xenograft in NOD/SCID mice. Right panels indicate intraabdominal tumors. (b) Statistically significant difference was not observed in tumor formation between wt and *Crb3*-KO WiDr cell injected mice. (c) Immunohistochemistry of wt and *Crb3*-KO WiDr xenograft tumor formed in NOD/SCID mice using anti-Crb3a antibody. Bottom panels indicate HE staining on the same visual field in serial sections.

Supporting Information Figure 5. Crb3a regulates FGFR1 signaling *in vitro*. (a) The

interaction between FLAG-Crb3a and HIS-tagged FGFR1, FGFR2 or FGFR4 were examined by HIS-pull down assay. (b) The interaction between Crb3a and Full-length FGFR4 or FGFR4 $\Delta$ cyto were examined by HIS-pull down assay. (c-e) wt and *Crb3*-KO DLD-1 cells stably expressing FGFR4-HIS were compared with control cells (empty) by immunoblot (c), MTT assay (d) or transwell chamber assay (e). Daggers represent statistical significance ( $p < 0.01$ ). (f and g) wt or *Crb3*-KO WiDr cells stably expressing FGFR1-HIS were compared with control cells (empty) by immunoblot (f) or MTT assay (g). (h) DLD-1 or WiDr stably expressing HIS-tagged FGFRs were analyzed by dual-color immunofluorescence using anti-FGFR1 or anti-FGFR4 and anti-Crb3a. (i) *Crb3*-KO DLD-1 cells treated with control siRNA or siFGFR1 were compared by transwell chamber assay. (j) ERK phosphorylation by recombinant FGF1 treatment was diminished in siFGFR1 treated DLD-1 cells. (k) Ligand stimulated ERK phosphorylation was not affected in siFGFR4 treated WiDr cells.

Supporting Information Figure 6. (a) *Crb3*-KO DLD-1 cells stably expressing FLAG-Crb3a were compared with control cells by immunoblot using antibodies against phosphor-FGFR1 (p-FGFR1), FGFR1, FLAG-tag or tubulin. (b) Conventional RT-PCR was performed using cDNA library from DLD-1, WiDr and normal human dermal fibroblast (NHDF). *Crb3a* and *Crb3b* transcripts were detected concurrently using common primes. (c) Domain structures and C-terminal amino acid sequences of Crb3 constructions. SP and TM indicate signal peptides and transmembrane domains respectively. (d) Pull-down assays using FGFR1-HIS and FLAG-Crb3b or FLAG-Crb3  $\Delta$  Cter constructs in HEK293T cells. (e) *Crb3*-KO DLD-1 cells stably expressing FLAG-Crb3a or FLAG-Crb3  $\Delta$  Cter were compared with control cells by immunoblot using

antibodies against phosphor-FGFR1 (p-FGFR1), FGFR1, FLAG-tag or tubulin. (f) *Crb3*-KO DLD-1 cells stably expressing FLAG-Crb3a or FLAG-Crb3  $\Delta$  Cter were compared with control cells by transwell chamber assay. (g) The expression epithelial-mesenchymal transition related proteins were not altered by the deficiency of *Crb3* in DLD-1 cells.

Supporting Information Figure 7. Crb3 and FGFR1 were coexpressed in patient-derived colon adenocarcinoma tissues. Immunohistochemistry was performed using anti-FGFR1 or anti-Crb3a on tissues including non-neoplastic colon crypts, primary lesion and metastatic foci. Panels indicate the same visual field in serial sections.

Supporting Information Figure 8. Deficiency of Crb3 altered FGFR1 localization in DLD-1 cells. Wild type DLD-1, *Crb3*-KO and revertant cells stably expressing FGFR1-HIS were analyzed by immunofluorescent. FGFR1 was detected using anti-HIS antibody (red). Counterstaining of F-actin was done with Alexa488-conjugated phalloidin (green).

Supporting information Table1. The list of primers and siRNAs used in this study.
